# Supplementary material for: Spatial transmission network construction of influenza-like illness using Dynamic Bayesian Network and Vector-Autoregressive Moving Average Model
Source: Research Square preprint supplement (doi:10.21203/rs.3.rs-56845/v2), 2020-11-23
Supplement: Supplementary file 1 [file 24fdf707bce49c7a581c4821.docx]

**Additional file 4 Structure learning result in each learning unit (adjacent cities)**

**A B**

**
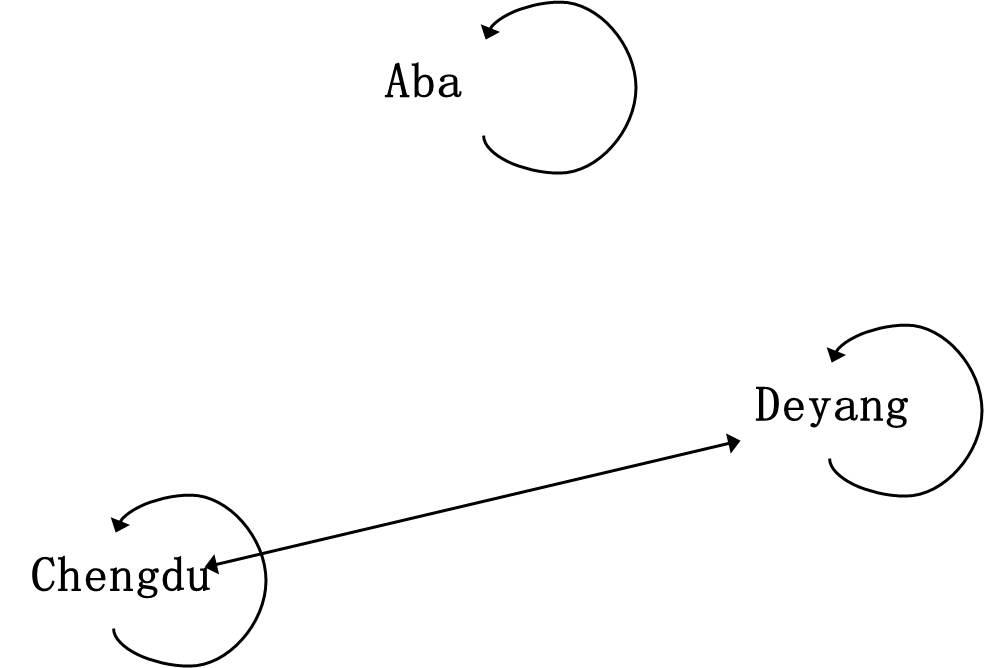

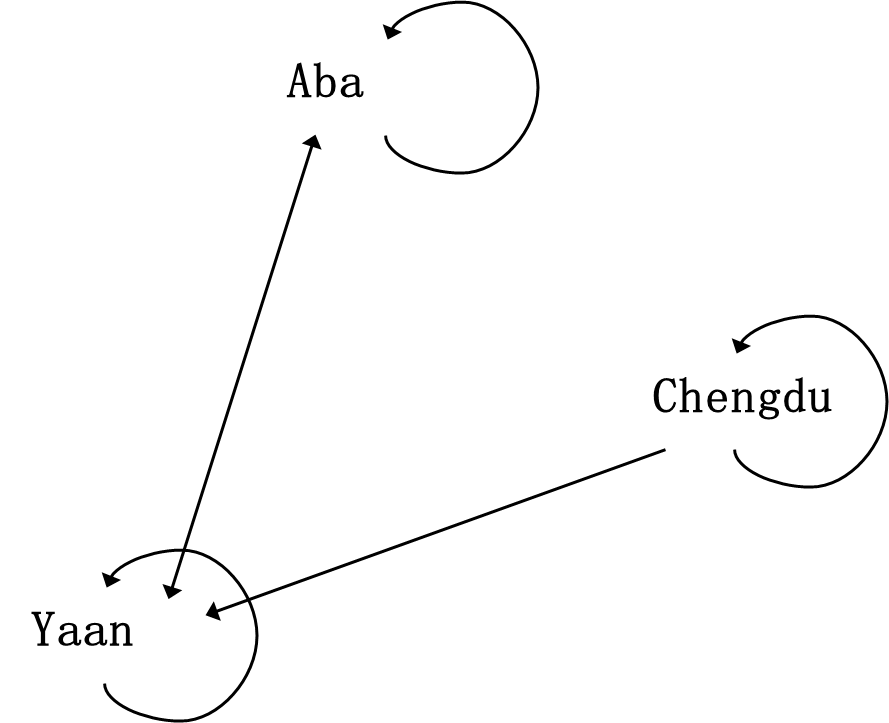
**

**C D**

**
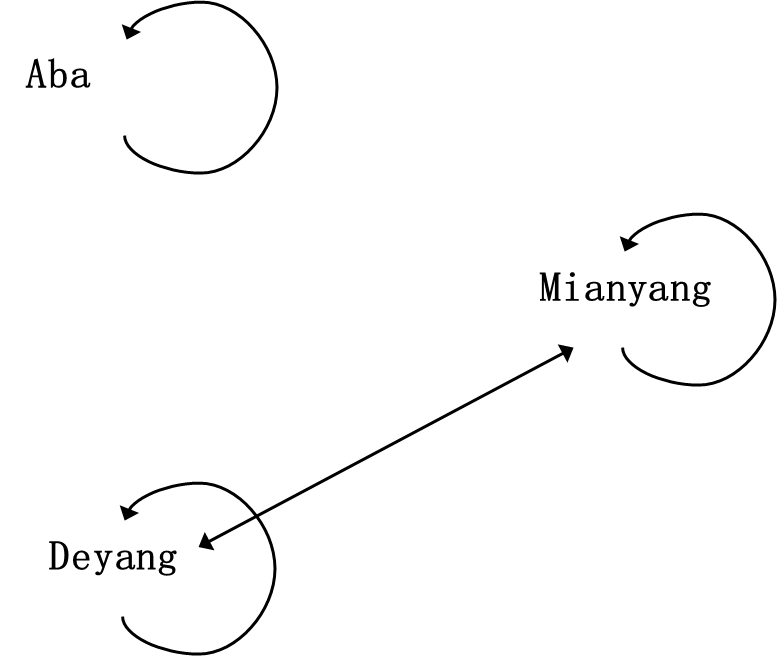

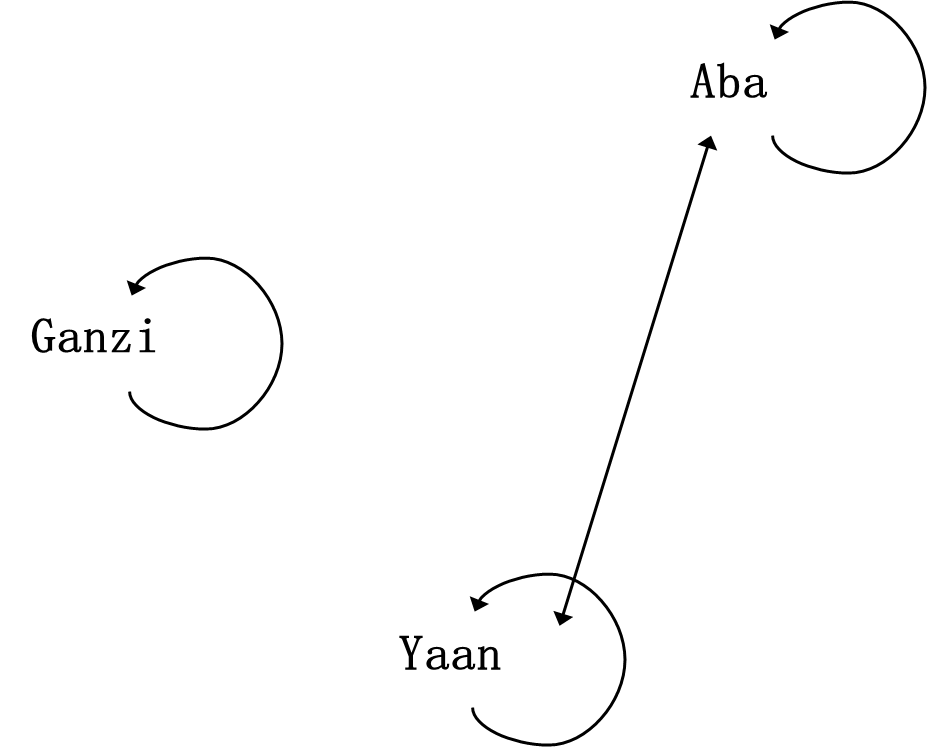
**

**E F**

**
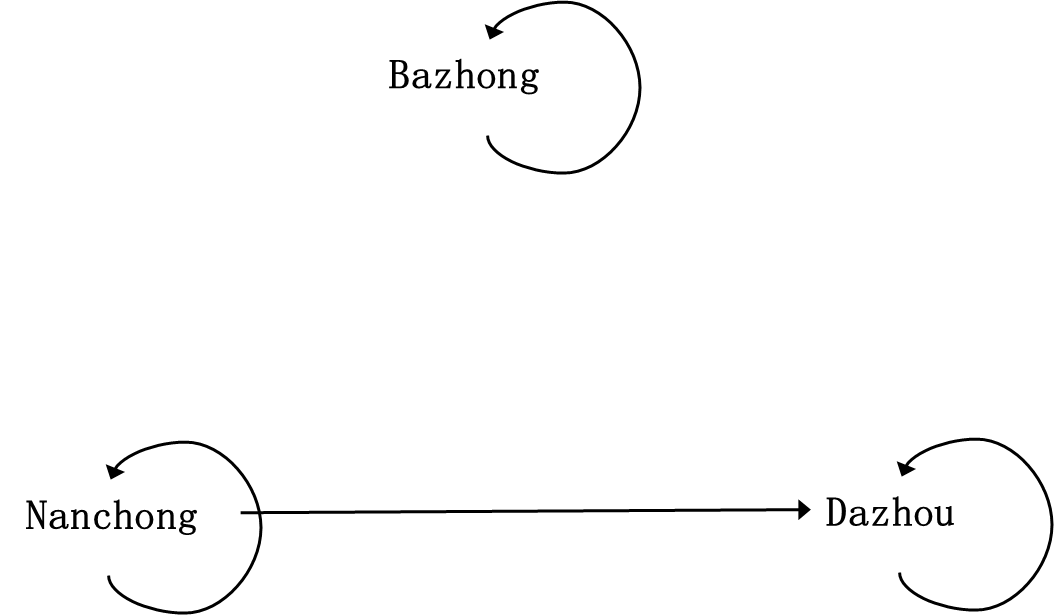

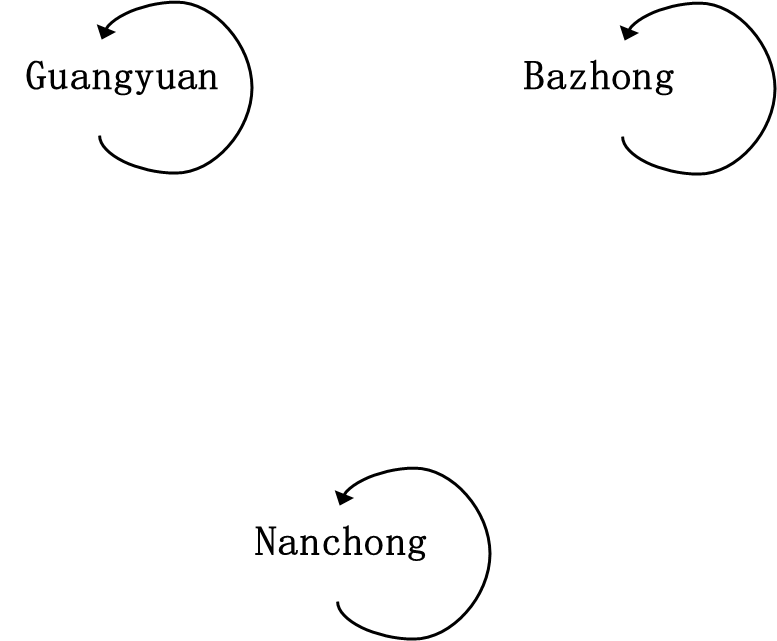
**

**G H**

**
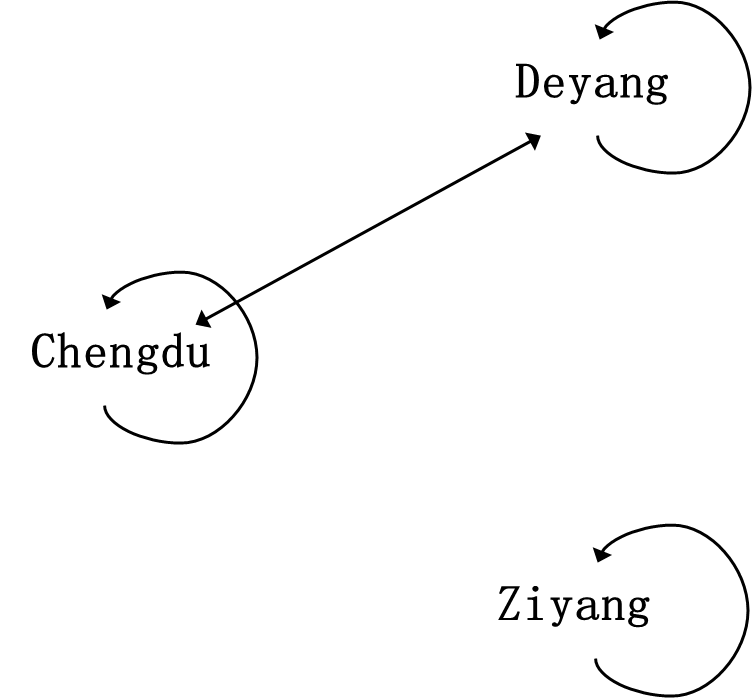

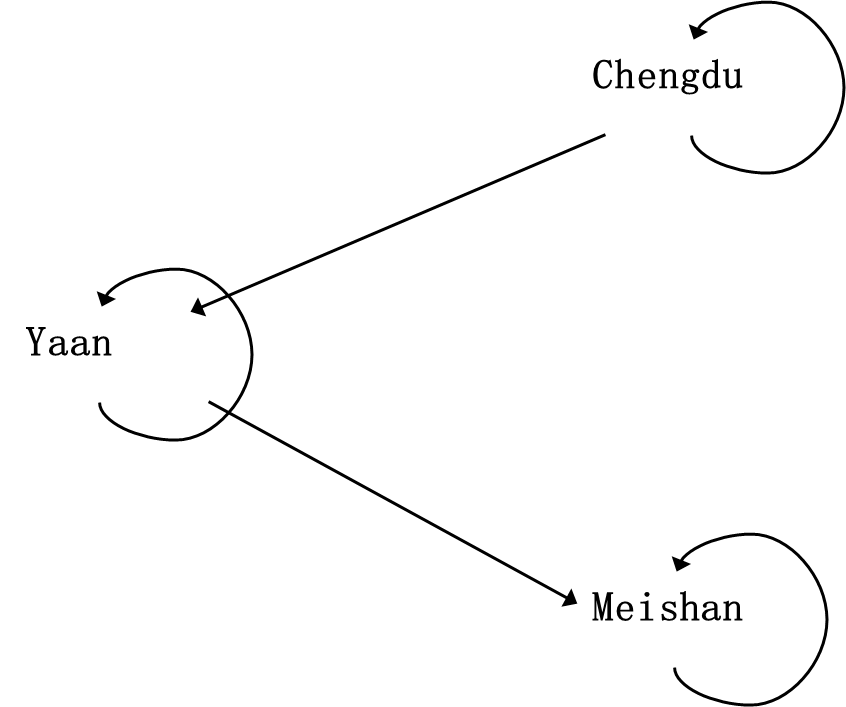
**

**I J**

**
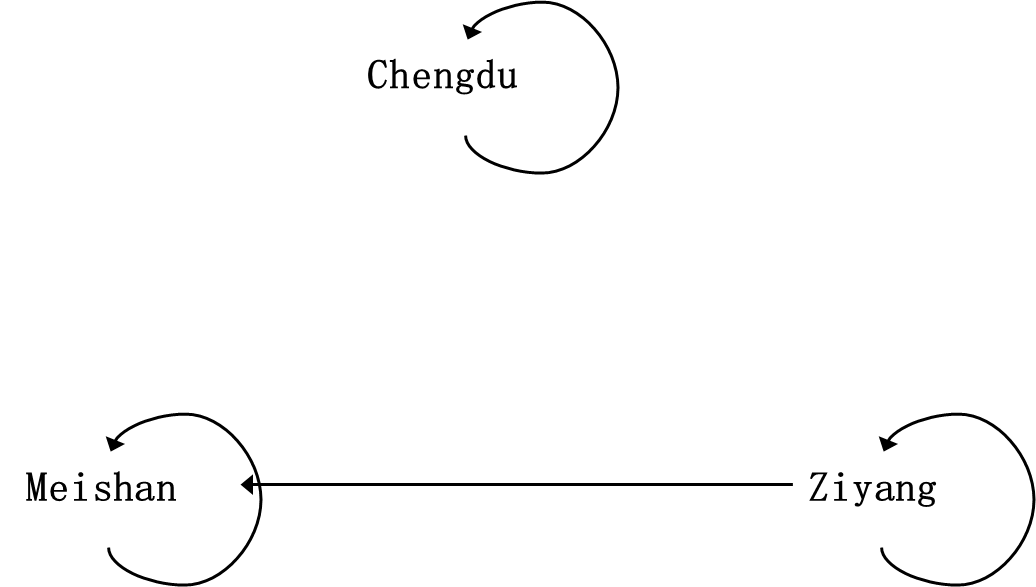

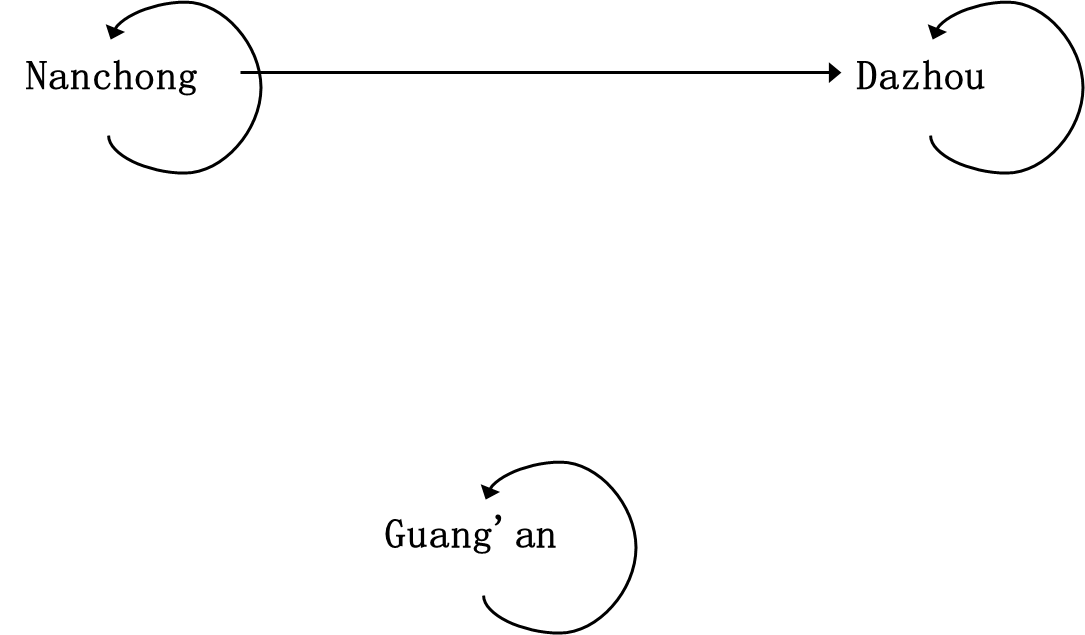
**

**K L**

**
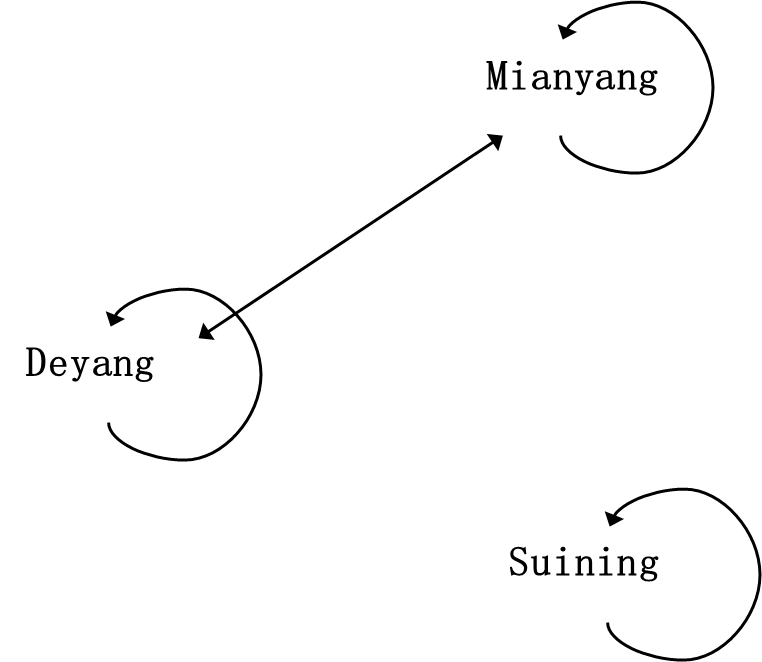

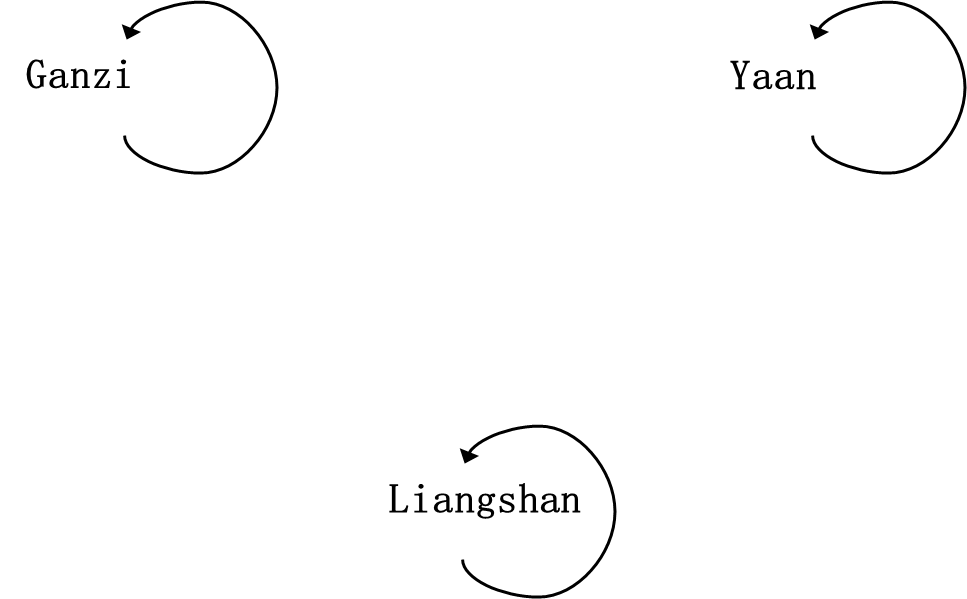
**

**M N**

**
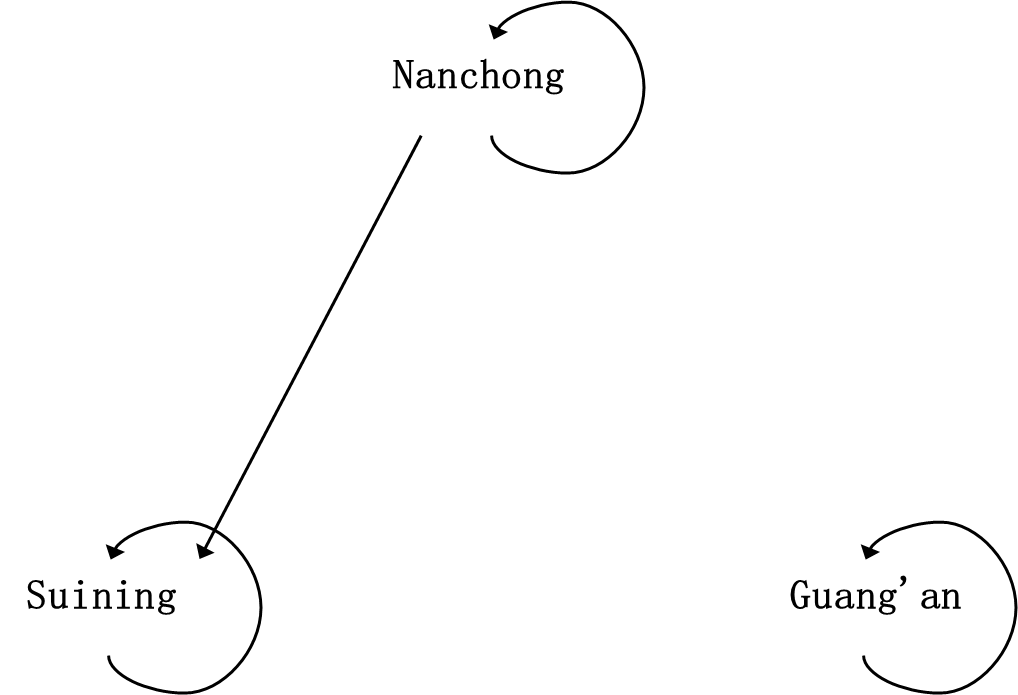

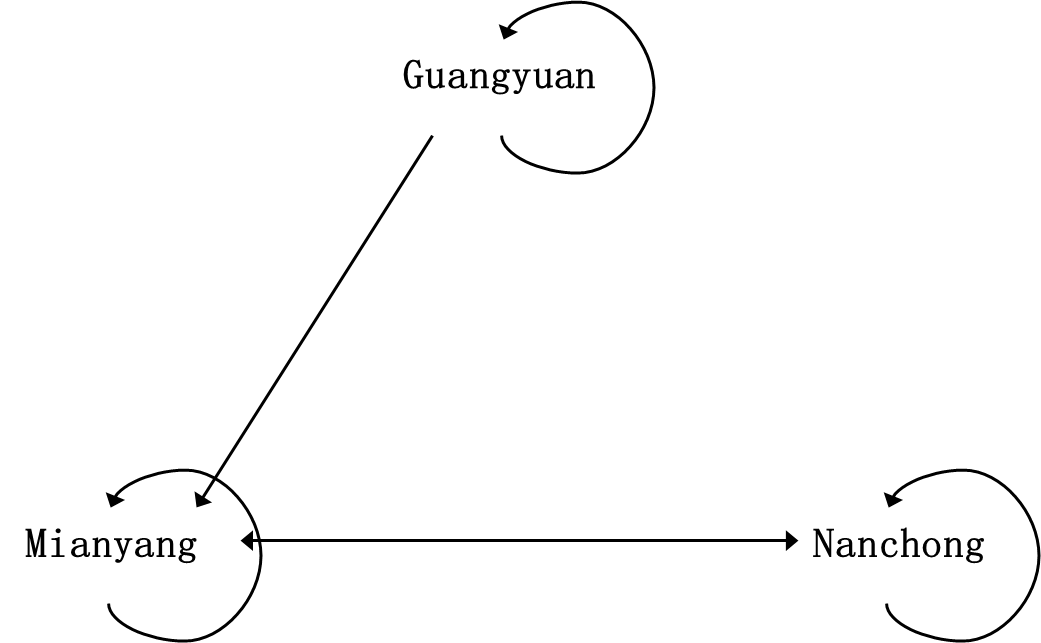
**

**O P**

**
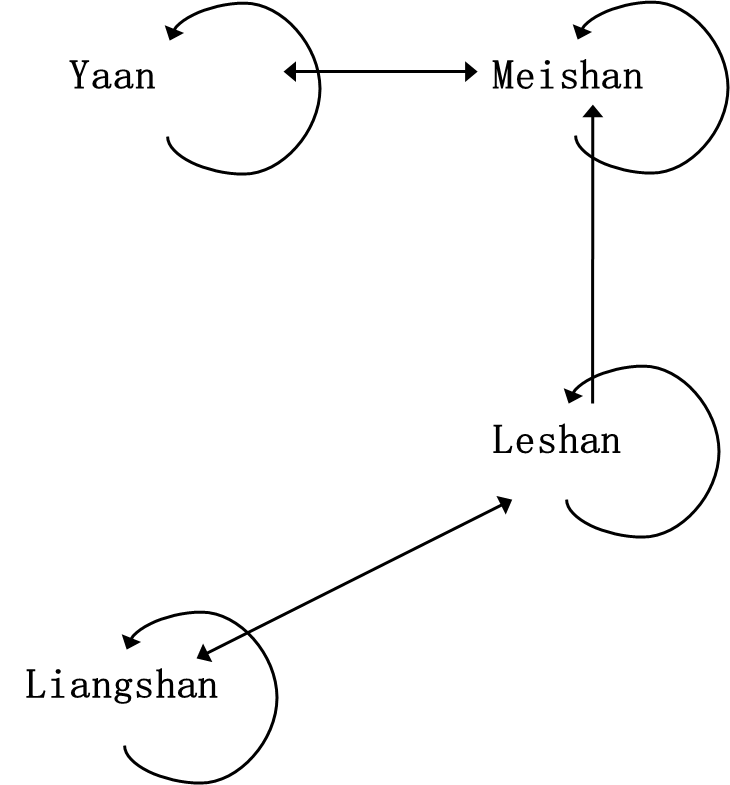

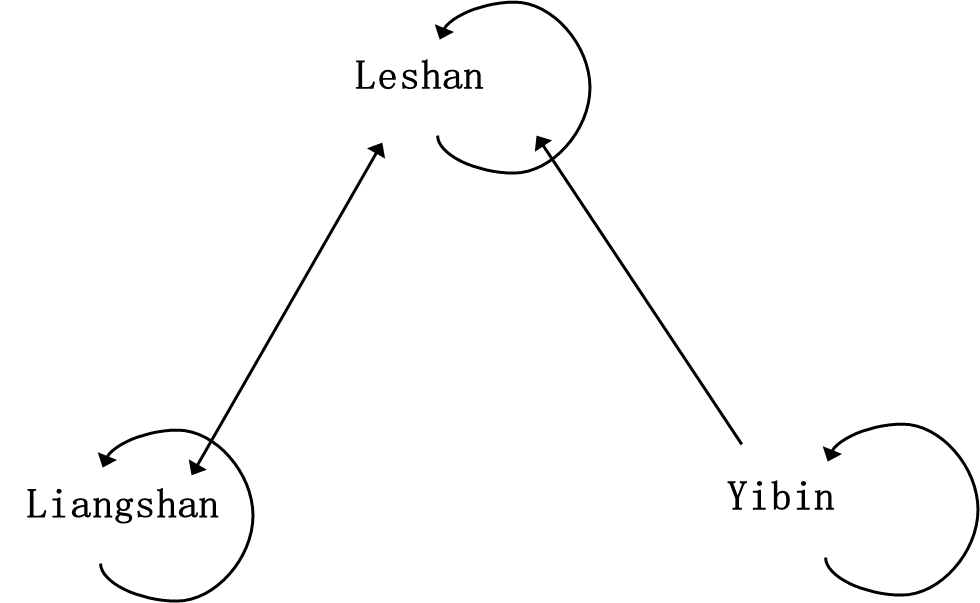
**

**Q R**

**
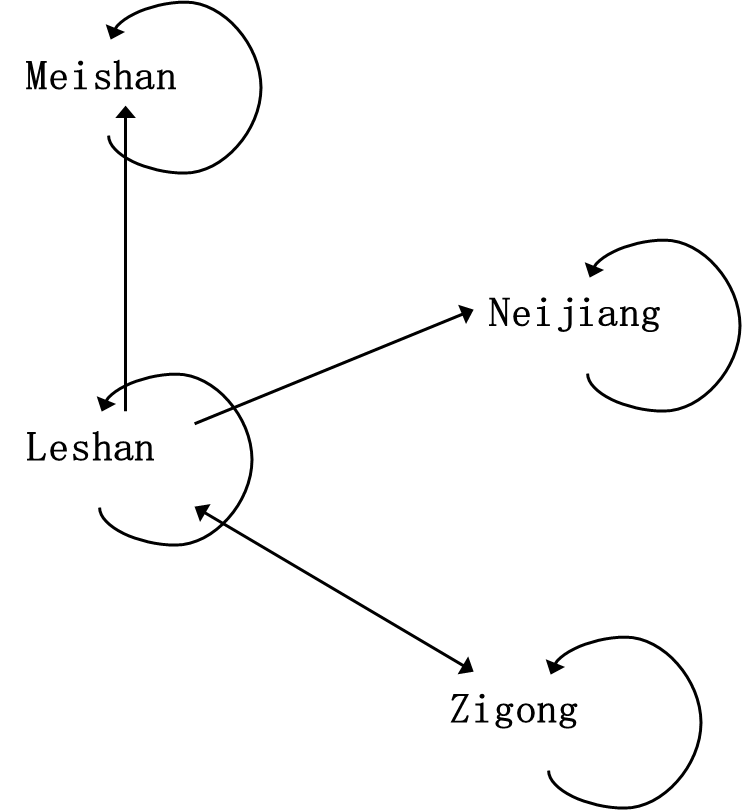

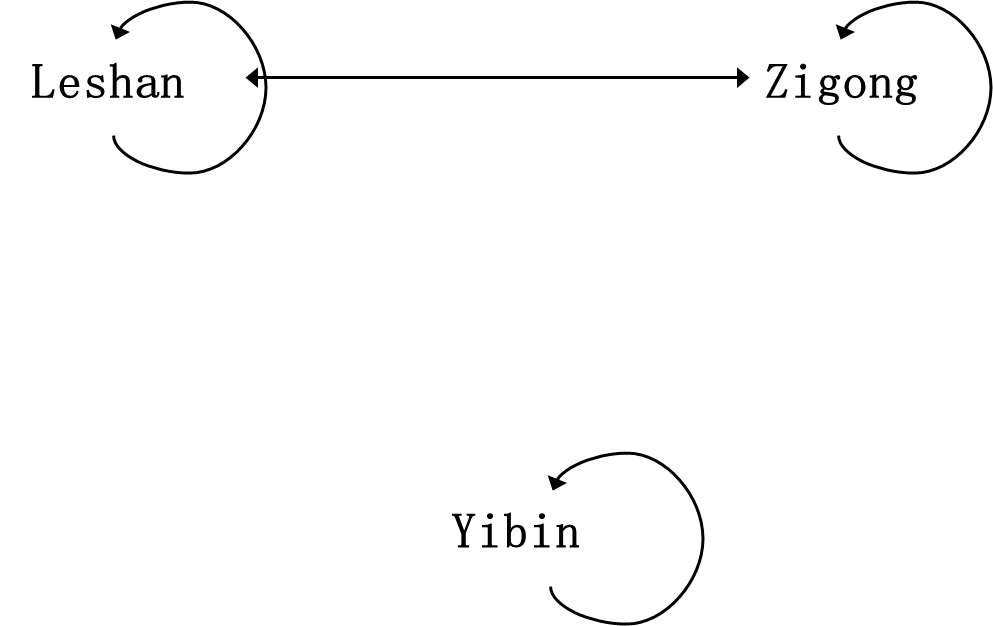
**

**S T**

**
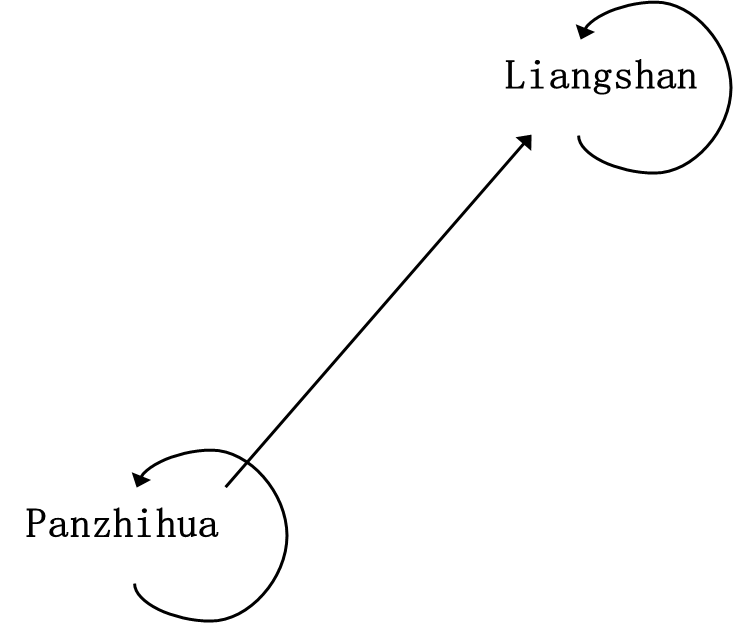

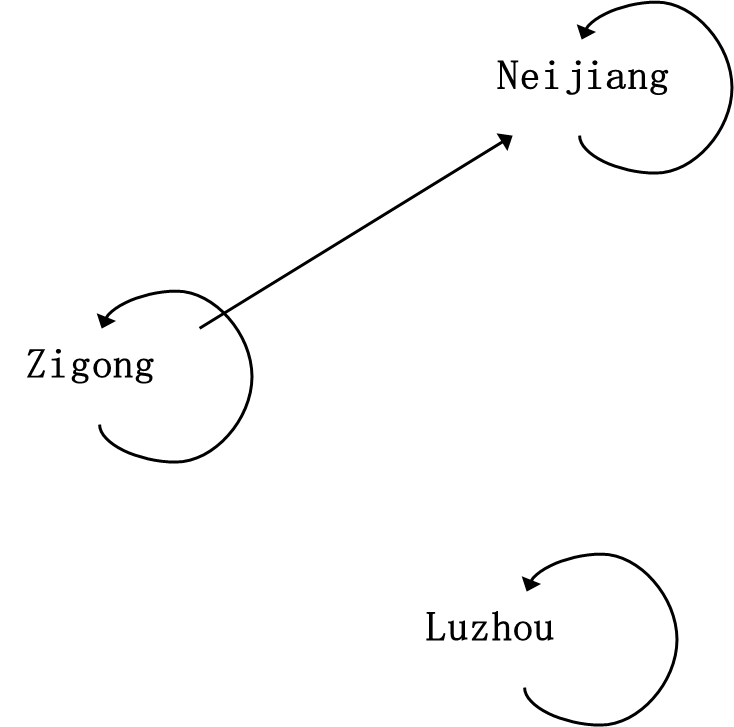
**

**U V**

**
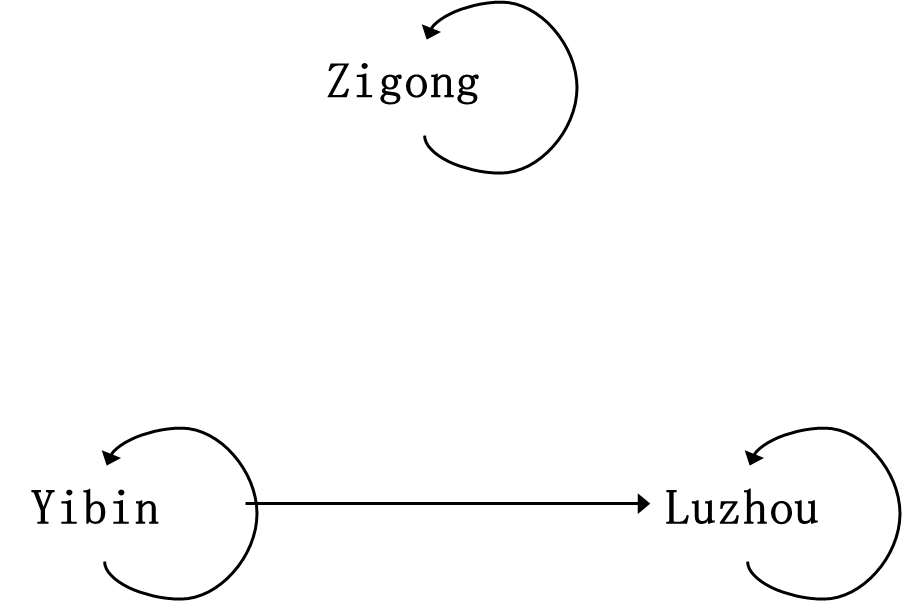

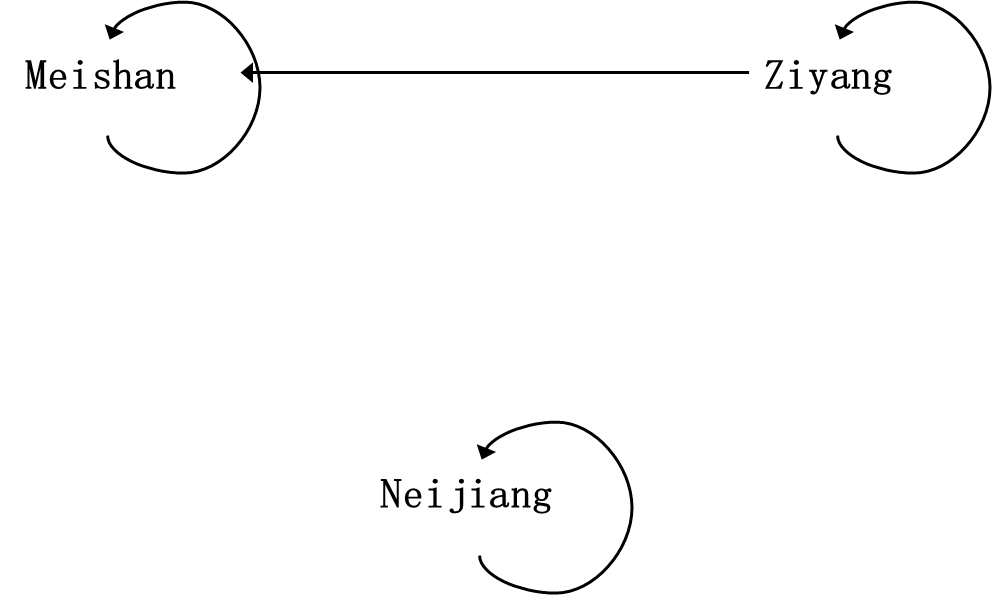
**

**W**

**
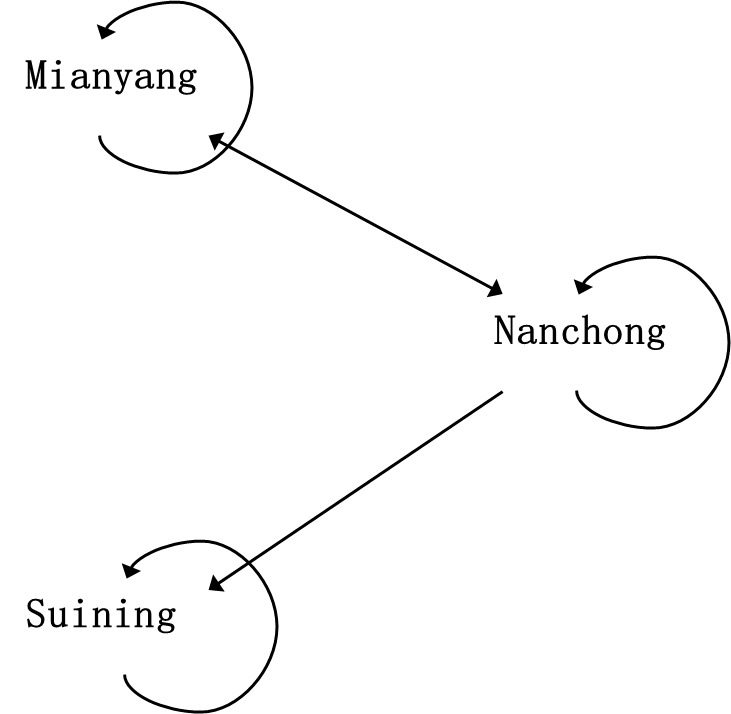
**
